# Supplementary material for: Vegetation Drastically Reduces Wind Erosion: An Implementation of the RWEQ in the Mongolian Gobi Steppe
Source: MDPI journal article supplement (doi:10.3390/land11081204), 2022-07-30
Supplement: s1 [file s1]

Archive with 1 entries (1 files):
- land-1759967-supplementary.pdf
